# Supplementary material for: Regulation of bile canalicular network formation and maintenance by AMP-activated protein kinase and LKB1
Source: Oxford University Press journal article supplement (doi:10.1242/jcs.068098), 2010-09-09
Supplement: jcs068098figs1.pdf [file jcs068098figs1.pdf]

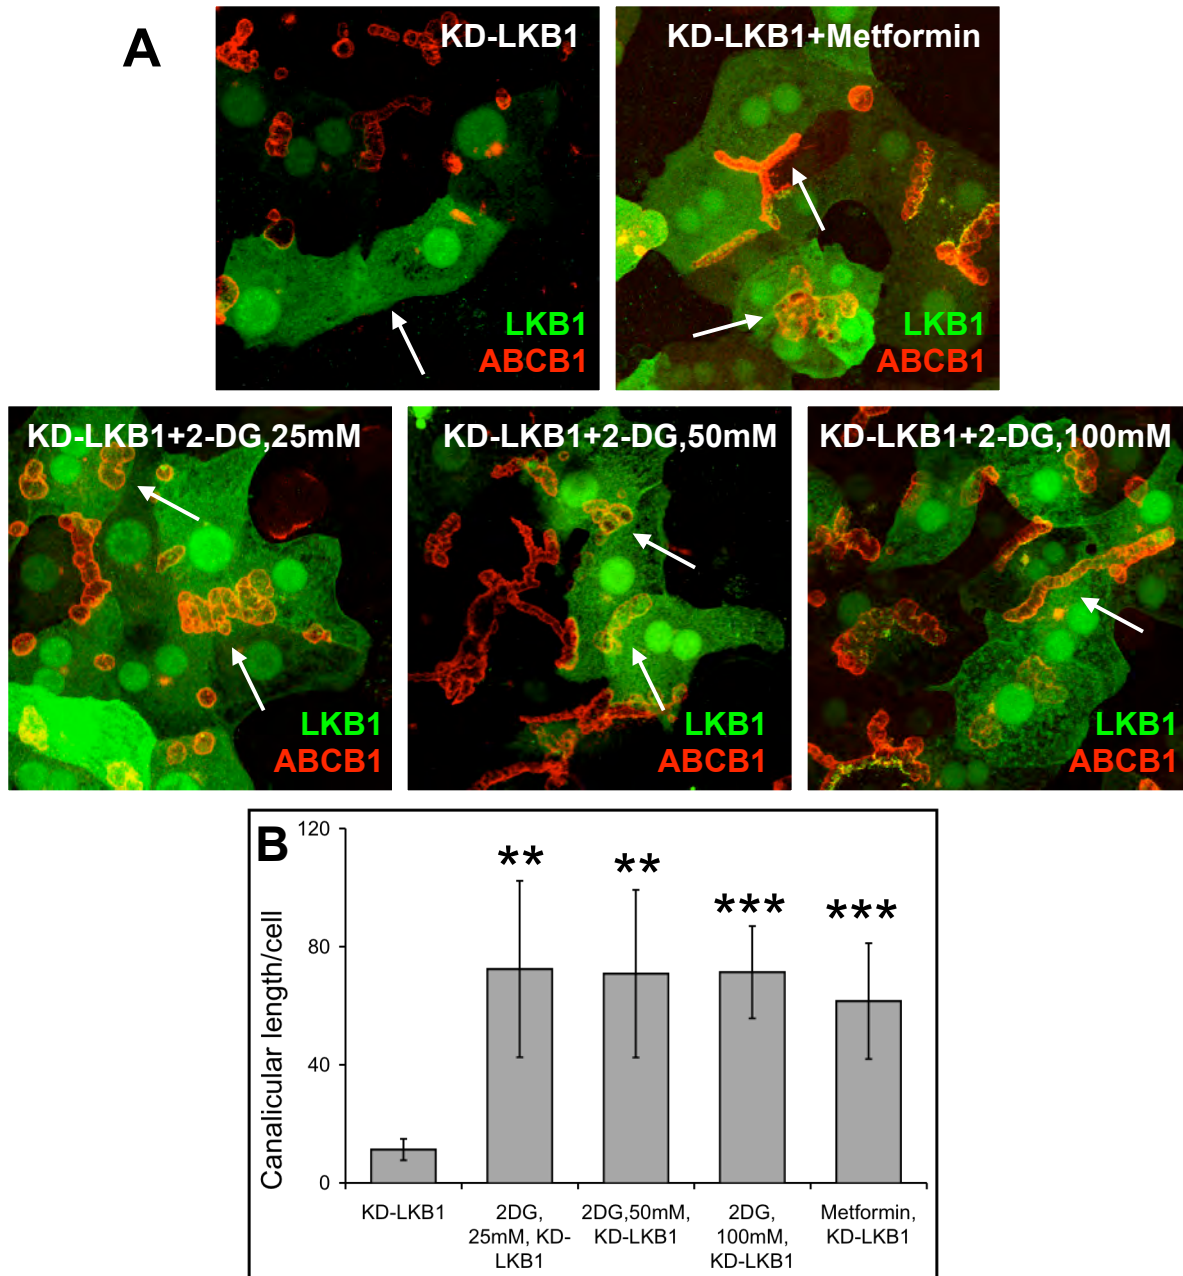

Supplementary Fig 1. Day 1 cultures were infected with KD-LKB1, 24 hours post infection, cells treated with 2-DG (25, 50, 100 mM) or metformin (500 micro M) for 24hours. **A:** Immunostaining for LKB1 (green) and ABCB1 (red). **B:** Canalicular length per cell (\*\*  $p < 0.01$ , \*\*\*  $p < 0.001$ ).
