# Supplementary material for: Regulation of bile canalicular network formation and maintenance by AMP-activated protein kinase and LKB1
Source: Oxford University Press journal article supplement (doi:10.1242/jcs.068098), 2010-09-09
Supplement: jcs068098figs2.pdf [file jcs068098figs2.pdf]

## Supplementary Figure 2:

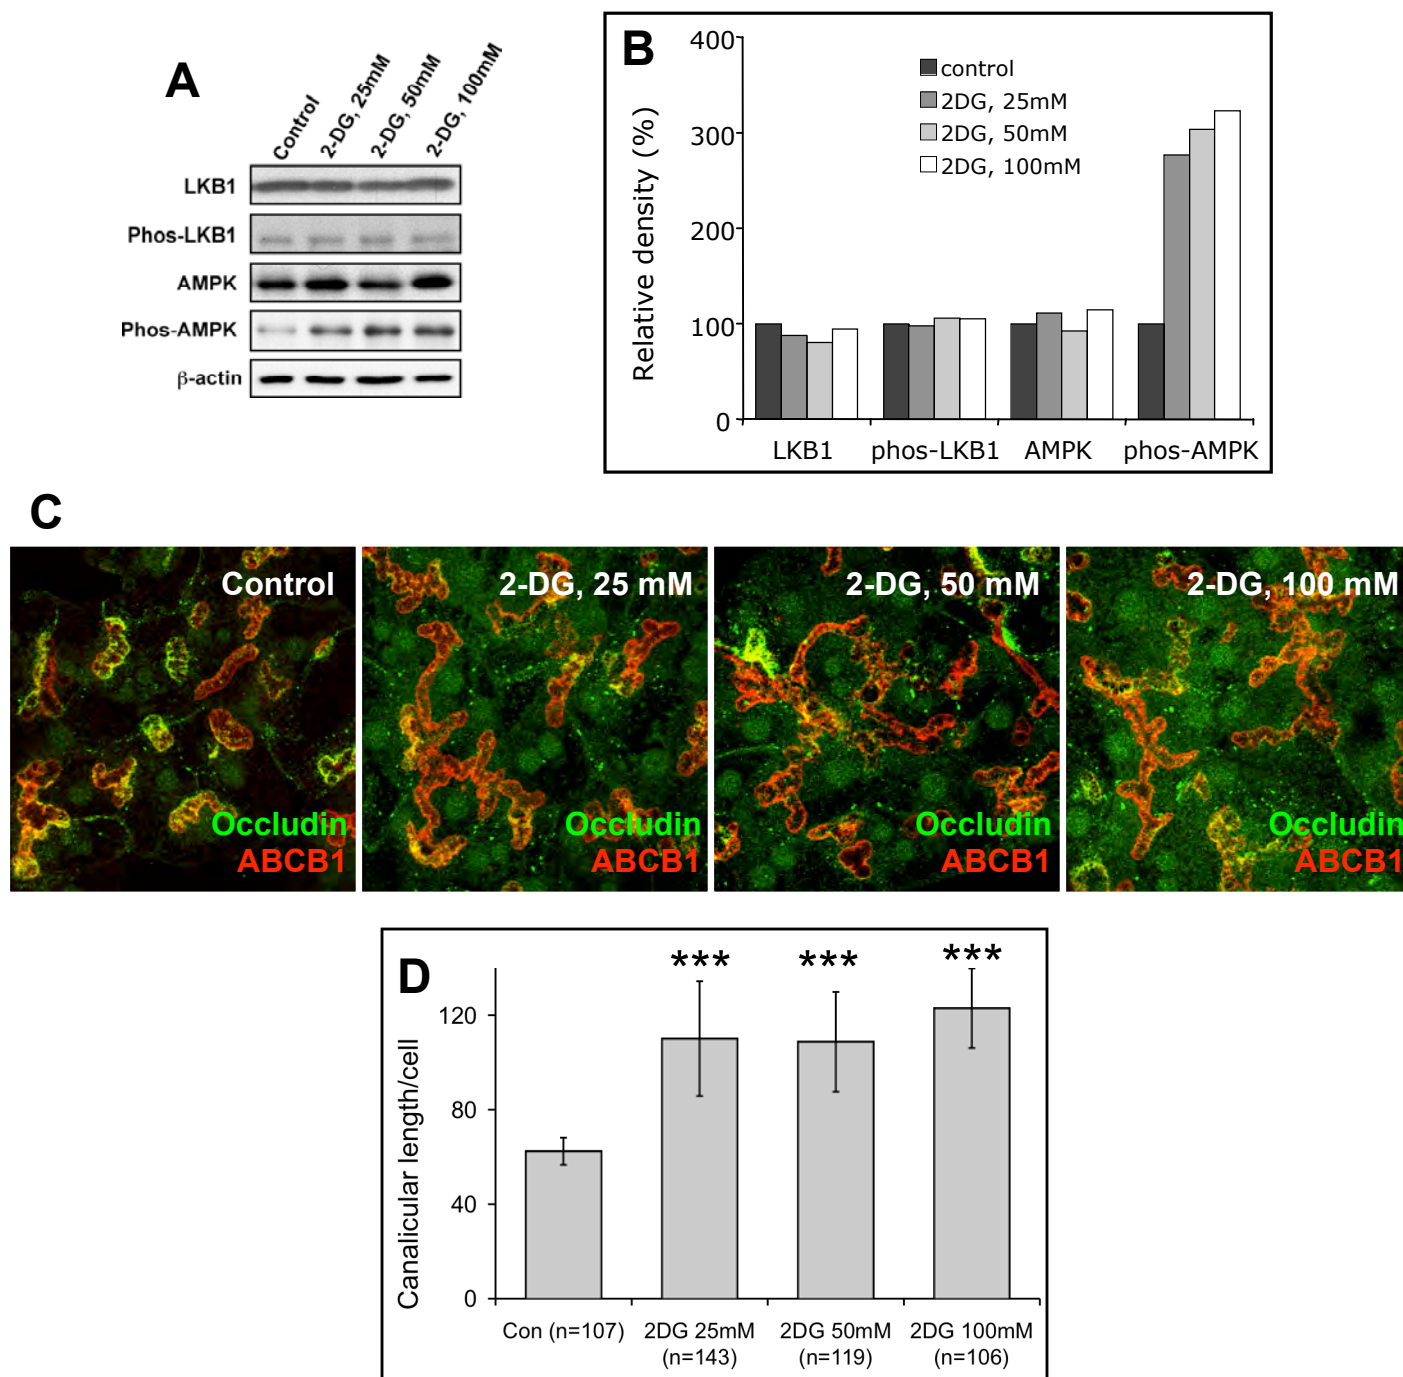

**Supplementary Fig 2.** Day 2 cultures were treated with or without 2-DG (25, 50, 100 mM, 24h). **A:** Western blot for LKB1, phosphorylated-LKB1 (Ser 431), AMPK and phosphorylated-AMPK (Thr 172). **B:** Densitometry measurement relative to the control. **C:** Immunostaining for occludin (green) and ABCB1 (red). **D:** Canaliculus length per cell (\*\*\*)  $p < 0.001$ .
